# Supplementary material for: Preparedness for and impact of COVID-19 on primary health care delivery in urban and rural Malawi: a mixed methods study
Source: HighWire-hosted journal article supplement (doi:10.1136/bmjopen-2021-051125), 2022-06-01
Supplement: bmjopen-2021-051125supp002_data_supplement.pdf [file bmjopen-2021-051125supp002_data_supplement.pdf]

### Summary of COVID preparedness from 31 health facilities across Blantyre District (Urban vs Rural) from August – October 2020

|                              |                                         | Urban  |           |         | Rural  |           |         |
|------------------------------|-----------------------------------------|--------|-----------|---------|--------|-----------|---------|
| <b>Staff training</b>        |                                         | August | September | October | August | September | October |
| All frontline workers        | Percentage trained in COVID-19          | 41.10% | 67.10%    | 80.70%  | 63.10% | 73.80%    | 84.70%  |
| <b>Hand washing</b>          |                                         | August | September | October | August | September | October |
| HWF at entrance              | Percentage of facilities                | 33.33% | 33.3%     | 25.0%   | 36.8%  | 37%       | 42.1%   |
| HWF at OPD                   | Percentage of facilities                | 67%    | 33.3%     | 41.7%   | 68.4%  | 74%       | 78.9%   |
| HWF HIV                      | Percentage of facilities                | 8%     | 16.67%    | 8.33%   | 31.58% | 26%       | 31.58%  |
| HWF at EPI                   | Percentage of facilities                | 8%     | 0.00%     | 0.00%   | 26.32% | 11%       | 5.26%   |
| HWF at Maternity / antenatal | Percentage of facilities                | 17%    | 8.33%     | 33.33%  | 73.68% | 68%       | 47%     |
| HWF at toilets               | Percentage of facilities                | 0%     | 0.00%     | 0.00%   | 10.53% | 0%        | 0%      |
| HWF in consultation room     | Percentage of facilities                | 25%    | 33.33%    | 8.33%   | 36.84% | 26%       | 11%     |
| No. HWF per facility         | Average number per facility             | 1.58   | 1.25      | 1.27    | 2.74   | 2.22      | 2.11    |
| HWF with soap and water      | Percentage with                         | 31.58% | 28.57%    | 28.57%  | 46.00% | 44.44%    | 33.33%  |
| HWF with water only          | Percentage with                         | 68.42% | 64.29%    | 71.43%  | 52.00% | 55.56%    | 66.67%  |
| Hand sanitiser               | Number with access (from 31)            | 2      | 1         | 0       | 1      | 1         | 0       |
| <b>Temperature checks</b>    |                                         | August | September | October | August | September | October |
| Thermometer available        | Number with access (from 31)            | 1      | 4         | 2       | 8      | 4         | 2       |
| Checks at entrance           | Number of the 31 health facilities      | 0      | 1         | 0       | 0      | 0         | 0       |
| Checks at waiting area       | Number of the 31 health facilities      | 0      | 0         | 0       | 0      | 0         | 1       |
| Checks in consultation room  | Number of the 31 health facilities      | 1      | 3         | 0       | 7      | 4         | 0       |
| <b>Masks</b>                 |                                         | August | September | October | August | September | October |
| Surgical masks available     | Percentage of facilities with available | 91.67% | 100.00%   | 83.33%  | 84.21% | 100.00%   | 89.47%  |
| N95 masks available          | Percentage of facilities with available | 16.67% | 25.00%    | 66.67%  | 52.63% | 42.11%    | 42.11%  |

| <i>Mask wearing</i>          |                   |        |        |        |        |        |         |
|------------------------------|-------------------|--------|--------|--------|--------|--------|---------|
| Health workers (non nursing) | Always wearing    | 41.67% | 50.00% | 8.33%  | 15.79% | 47.37% | 26.32%  |
|                              | Sometimes wearing | 58.33% | 50.00% | 83.33% | 42.11% | 47.37% | 57.89%  |
|                              | Not wearing       | 0.00%  | 0.00%  | 8.33%  | 42.11% | 5.26%  | 15.79%  |
| Nurses                       | Always wearing    | 27.27% | 50.00% | 25.00% | 26.32% | 42.11% | 26.32%  |
|                              | Sometimes wearing | 63.64% | 16.67% | 66.67% | 31.58% | 36.84% | 47.37%  |
|                              | Not wearing       | 9.09%  | 33.33% | 8.33%  | 42.11% | 21.05% | 26.32%  |
| Auxiliary staff              | Always wearing    | 16.67% | 50.00% | 0.00%  | 5.26%  | 36.84% | 21.05%  |
|                              | Sometimes wearing | 50.00% | 41.67% | 25.00% | 47.37% | 31.58% | 63.16%  |
|                              | Not wearing       | 33.33% | 8.33%  | 75.00% | 47.37% | 31.58% | 15.79%  |
| Patients                     | Always wearing    | 0.00%  | 33.33% | 0.00%  | 0.00%  | 5.26%  | 5.26%   |
|                              | Sometimes wearing | 41.67% | 66.67% | 91.67% | 21.05% | 57.89% | 57.89%  |
|                              | Not wearing       | 58.33% | 0.00%  | 8.33%  | 78.95% | 36.84% | 36.84%  |
| Guardians                    | Always wearing    | 0.00%  | 41.67% | 0.00%  | 0.00%  | 5.26%  | 5.26%   |
|                              | Sometimes wearing | 8.33%  | 41.67% | 91.67% | 5.26%  | 57.89% | 57.89%  |
|                              | Not wearing       | 91.67% | 16.67% | 8.33%  | 94.74% | 36.84% | 36.84%  |
| <i>Mask type</i>             |                   |        |        |        |        |        |         |
| Health workers (general)     | Surgical          | 74.43% | 80.00% | 84.62% | 76.92% | 66.67% | 94.12%  |
|                              | N95               | 28.57% | 13.33% | 15.38% | 23.08% | 22.22% | 5.88%   |
|                              | Cloth             | 0.00%  | 6.67%  | 0.00%  | 0.00%  | 11.11% | 0.00%   |
| Nurses                       | Surgical          | 76.92% | 88.89% | 91.67% | 84.62% | 78.95% | 93.33%  |
|                              | N95               | 23.08% | 11.11% | 8.33%  | 15.38% | 21.05% | 6.67%   |
|                              | Cloth             | 0.00%  | 0.00%  | 0.00%  | 0.00%  | 0.00%  | 0.00%   |
| Auxiliary staff              | Surgical          | 77.78% | 83.33% | 75.00% | 84.62% | 86.67% | 100.00% |
|                              | N95               | 22.22% | 8.33%  | 8.33%  | 15.38% | 13.33% | 0.00%   |
|                              | Cloth             | 0.00%  | 8.33%  | 16.67% | 0.00%  | 0.00%  | 0.00%   |
| Patients                     | Surgical          | 42.86% | 40.91% | 35.00% | 80.00% | 42.86% | 38.10%  |
|                              | N95               | 0.00%  | 4.55%  | 10.00% | 0.00%  | 0.00%  | 4.76%   |
|                              | Cloth             | 57.14% | 54.55% | 55.00% | 20.00% | 57.14% | 57.14%  |

|                                          |                                    |         |           |         |        |           |         |
|------------------------------------------|------------------------------------|---------|-----------|---------|--------|-----------|---------|
| Guardians                                | Surgical                           | 50.00%  | 50.00%    | 40.00%  | 50.00% | 42.86%    | 36.84%  |
|                                          | N95                                | 0.00%   | 0.00%     | 5.00%   | 0.00%  | 4.76%     | 5.26%   |
|                                          | Cloth                              | 50.00%  | 50.00%    | 55.00%  | 50.00% | 52.38%    | 57.89%  |
| <b>Waste management</b>                  |                                    | August  | September | October | August | September | October |
| Pit                                      | Number of the 31 health facilities | 6       | 4         | 2       | 3      | 1         | 5       |
| Incinerator                              | Number of the 31 health facilities | 6       | 13        | 10      | 13     | 8         | 9       |
| Open burning                             | Number of the 31 health facilities | 0       | 3         | 0       | 3      | 2         | 5       |
| <b>Physical distancing</b>               |                                    | August  | September | October | August | September | October |
| Physical distancing on arrival           | Number of the 31 health facilities | 5       | 6         | 3       | 4      | 8         | 3       |
|                                          | Word of mouth                      | 50%     | 66.67%    | 25.00%  | 40.00% | 75.00%    | 66.67%  |
|                                          | Chairs spaced                      | 38%     | 16.67%    | 0.00%   | 60.00% | 0.00%     | 0.00%   |
|                                          | Floor markings                     | 13%     | 16.67%    | 0.00%   | 0.00%  | 25.00%    | 33.33%  |
| Physical distancing in waiting area      | Number of the 31 health facilities | 7       | 9         | 6       | 6      | 9         | 7       |
|                                          | Word of mouth                      | 45.46%  | 33.33%    | 42.67%  | 28.57% | 50.00%    | 55.56%  |
|                                          | Chairs spaced                      | 27.27%  | 16.67%    | 8.33%   | 74.43% | 25.00%    | 0.00%   |
|                                          | Floor markings                     | 27.27%  | 41.67%    | 33.33%  | 0.00%  | 25.00%    | 44.44%  |
| Physical distancing in consultation area | Number of the 31 health facilities | 9       | 6         | 5       | 7      | 11        | 9       |
|                                          | Word of mouth                      | 54.55%  | 25.00%    | 0.00%   | 50.00% | 26.67%    | 20.00%  |
|                                          | Chairs spaced                      | 45.46%  | 50.00%    | 41.67%  | 50.00% | 73.33%    | 70.00%  |
|                                          | Floor markings                     | 0.00%   | 0.00%     | 0.00%   | 0.00%  | 0.00%     | 10.00%  |
| Physical distancing in wards             | Number of the 31 health facilities | 1       | 0         | 0       | 5      | 2         | 1       |
|                                          | Word of mouth                      | 100.00% | 0.0%      | 0.0%    | 33.33% | 0.00%     | 0%      |
|                                          | Chairs spaced                      | 0.00%   | 0.0%      | 0.0%    | 66.67% | 100.00%   | 100%    |
|                                          | Floor markings                     | 0.00%   | 0.0%      | 0.0%    | 0.00%  | 0.00%     | 0%      |
| <b>Case management</b>                   |                                    | August  | September | October | August | September | October |
| Isolation room                           | Number of the 31 health facilities | 1       | 2         | 2       | 2      | 2         | 2       |
| Presence of suspected cases              | Number of the 31 health facilities | 8       | 8         | 8       | 4      | 7         | 11      |

|                                       |                           |        |        |        |     |        |        |
|---------------------------------------|---------------------------|--------|--------|--------|-----|--------|--------|
| Action to take when case is available | Give a mask               | 11.11% | 0.00%  | 11.11% | 16% | 8.70%  | 10.53% |
|                                       | Isolation                 | 33.33% | 16.67% | 44%    | 32% | 30.43% | 31.58% |
|                                       | Call covid-19 team at DHO | 33.33% | 50.00% | 33%    | 39% | 34.78% | 31.58% |
|                                       | Call hotline number       | 0.00%  | 16.67% | 0%     | 10% | 13.04% | 5.26%  |
|                                       | Other                     | 22.22% | 16.67% | 11%    | 3%  | 13.04% | 21.05% |
